# Supplementary material for: Fabrication of High-Acyl Gellan-Gum-Stabilized β-Carotene Emulsion: Physicochemical Properties and In Vitro Digestion Simulation
Source: MDPI journal article supplement (doi:10.3390/foods11121742), 2022-06-14
Supplement: s1 [file s1]

## Supplementary material

### Fabrication of high acyl gellan gum stabilized $\beta$ -carotene emulsion: physicochemical properties and in vitro digestion model

**Table S1.** Conditions of in vitro simulated digestion

| Process of simulated digestion              | Conditions                               | Composition                      | Concentration |
|---------------------------------------------|------------------------------------------|----------------------------------|---------------|
| simulated oral digestion phase (SODP)       | T=37 °C<br>pH=7.0<br>Simulated time=3min | KCl                              | 0.896g/L      |
|                                             |                                          | NaH <sub>2</sub> PO <sub>4</sub> | 0.888g/L      |
|                                             |                                          | Na <sub>2</sub> SO <sub>4</sub>  | 0.57g/L       |
|                                             |                                          | NaCl                             | 0.298g/L      |
|                                             |                                          | $\alpha$ -amylase                | 0.6g/L        |
| simulated gastric digestion phase (SGDP)    | T=37 °C<br>pH=2.0<br>Simulated time =1h  | NaCl                             | 2g/L          |
|                                             |                                          | Pepsase                          | 3.2mg/mL      |
|                                             |                                          |                                  |               |
| simulated intestinal digestion phase (SIDP) | T=37 °C<br>pH=7.0<br>Simulated time =2h  | Pancreatic enzyme                | 2.2mg/mL      |
|                                             |                                          | Bile salt of pig                 | 44mg/mL       |
|                                             |                                          | Saccharifying enzyme             | 140U          |
|                                             |                                          | CaCl <sub>2</sub>                | 0.2442mg/mL   |
